# Supplementary material
Source: PubMed Central journal article supplement (PMC4930685)

Supplementary Figure 1

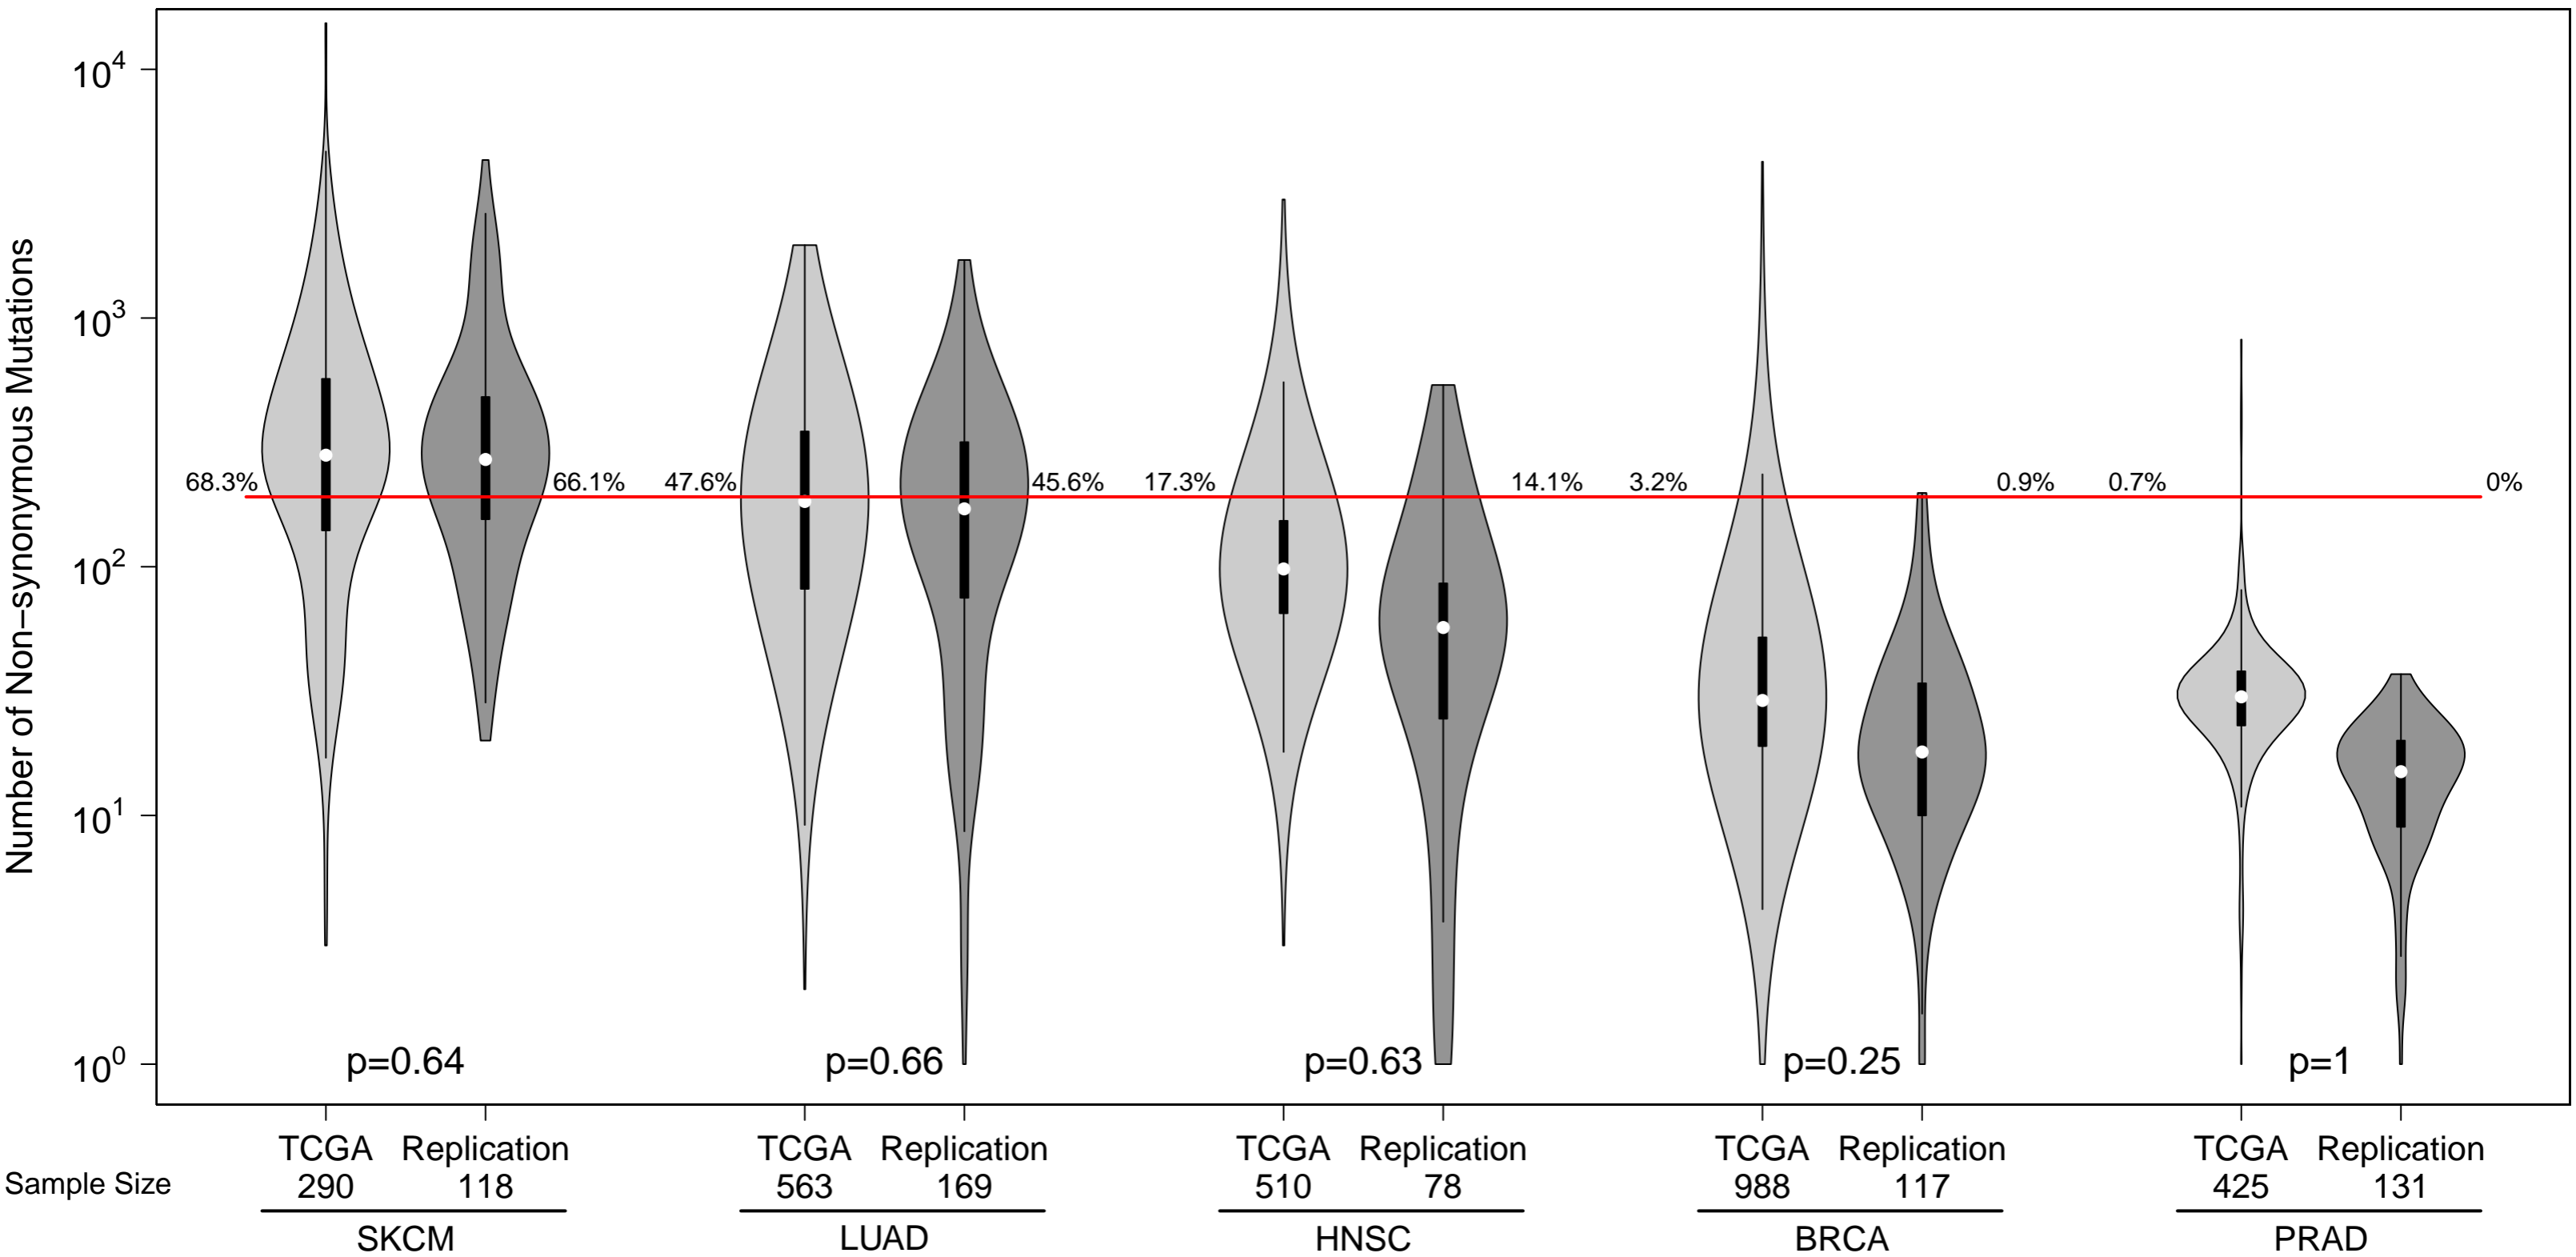

Supplement: NIHMS791660-supplement-2.pdf [file NIHMS791660-supplement-2.pdf]

Supplementary Figure 2

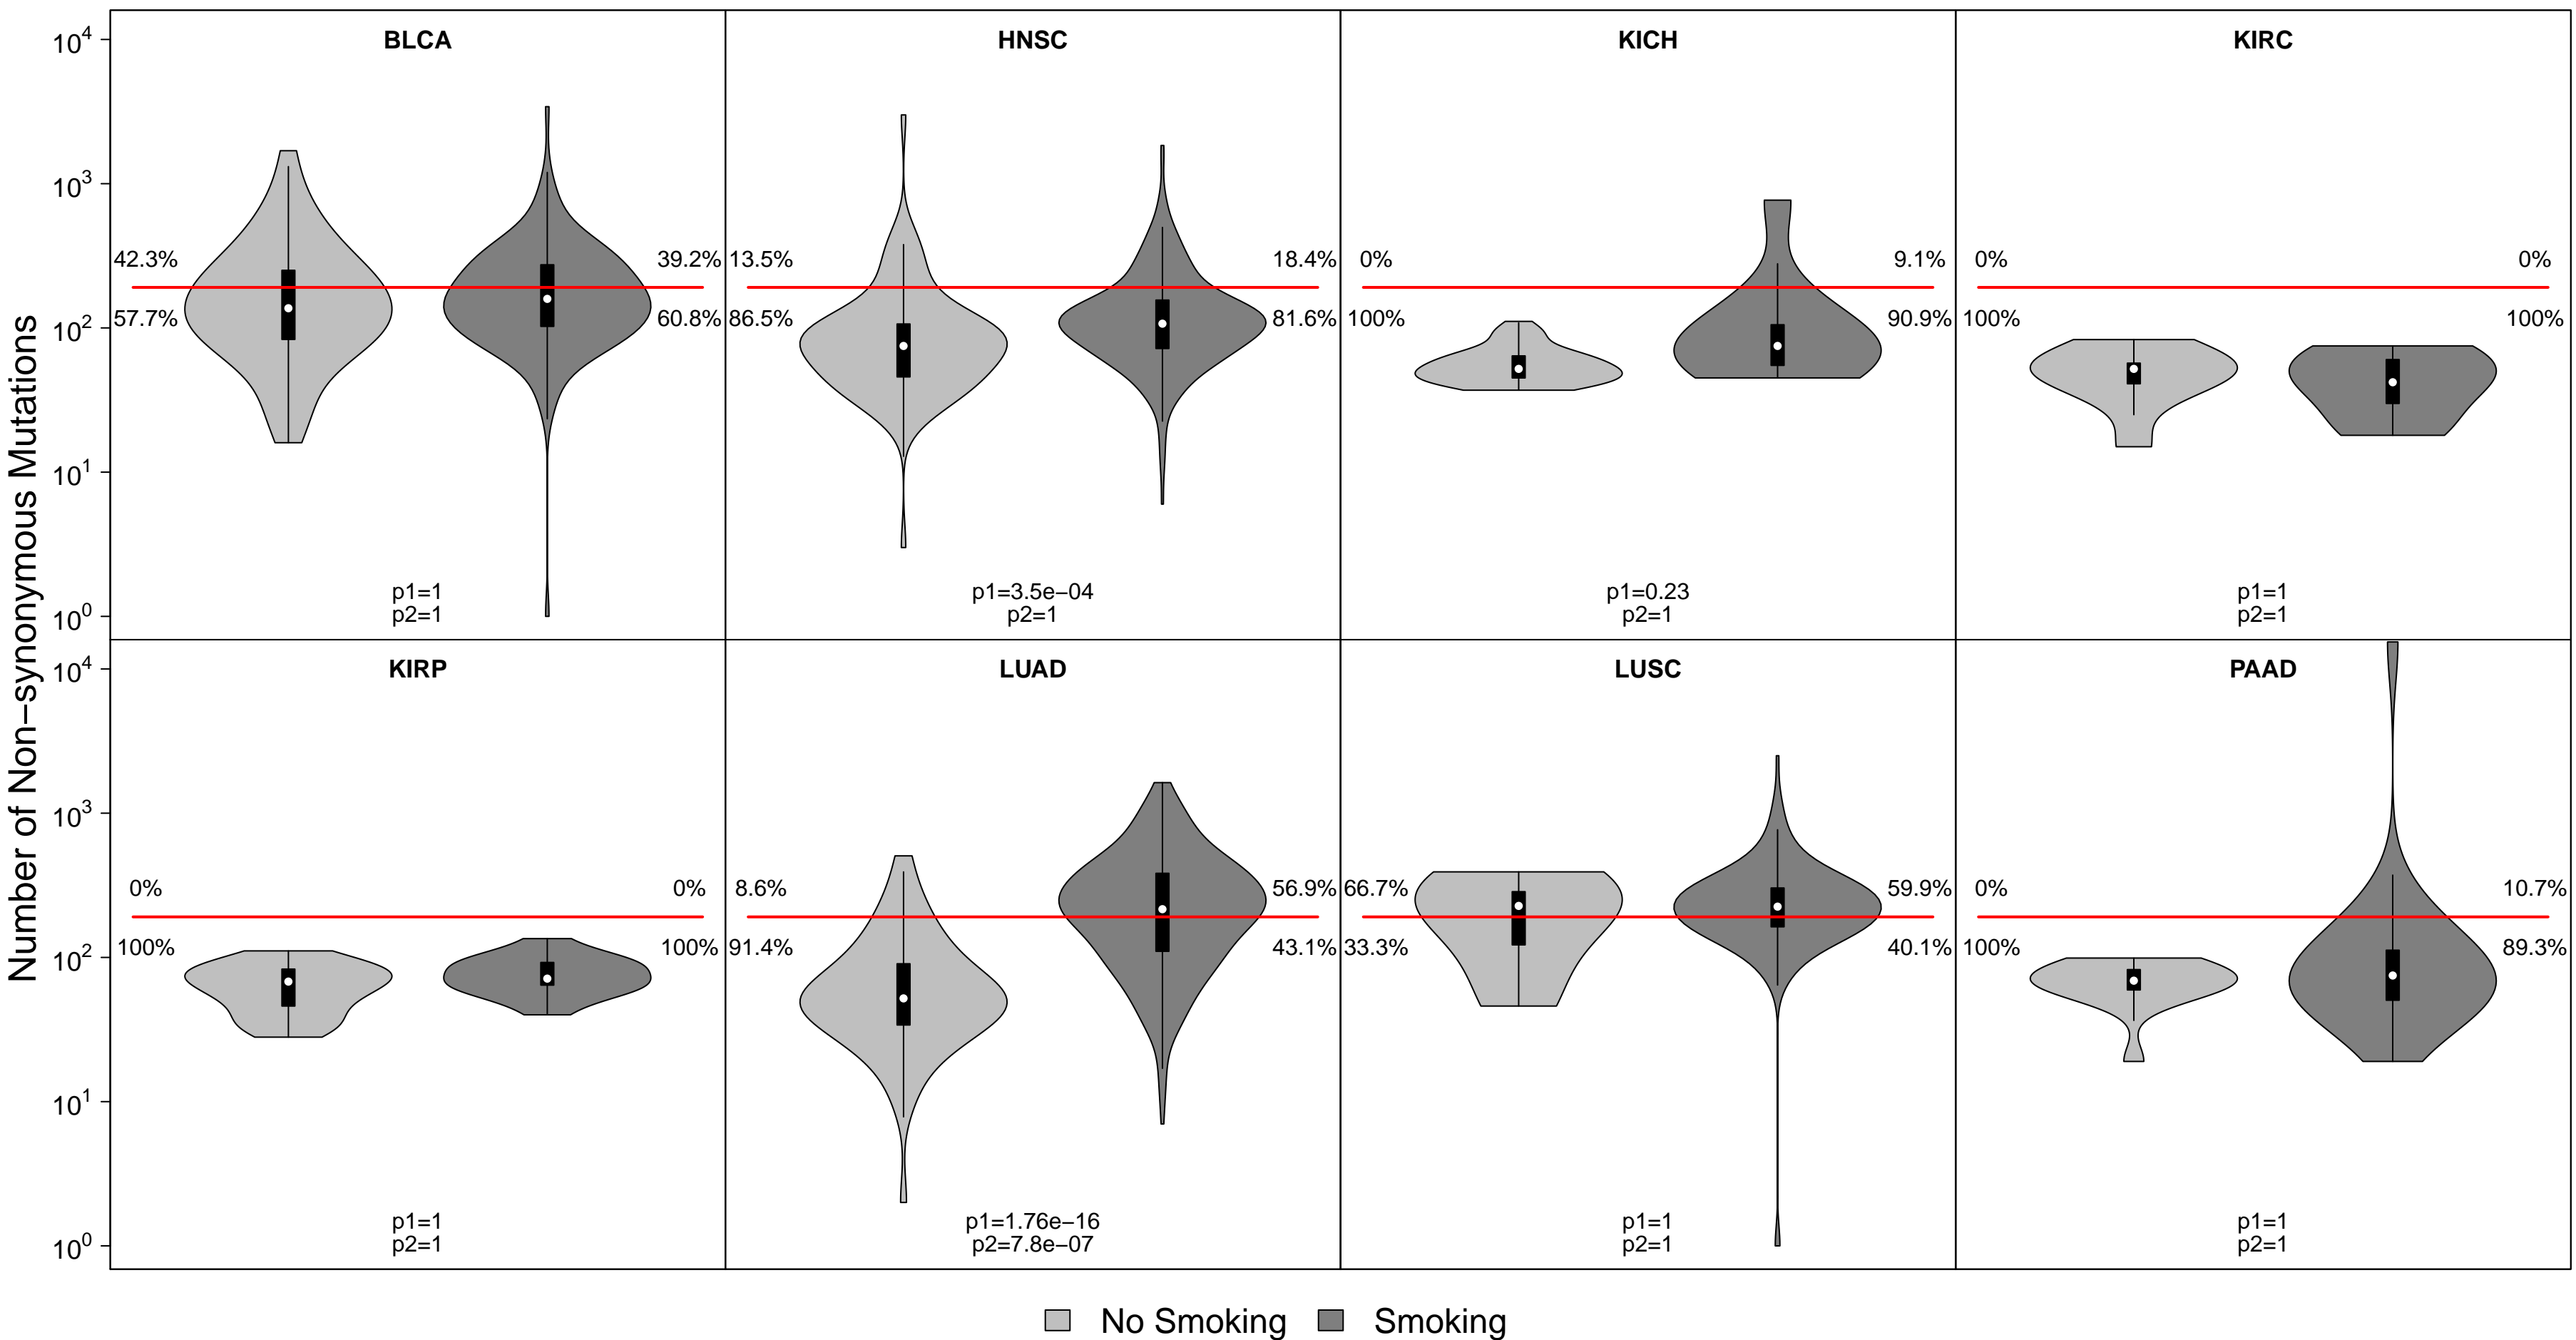

Supplement: NIHMS791660-supplement-3.pdf [file NIHMS791660-supplement-3.pdf]

Supplementary Figure 3

Number of Non-synonymous Mutations

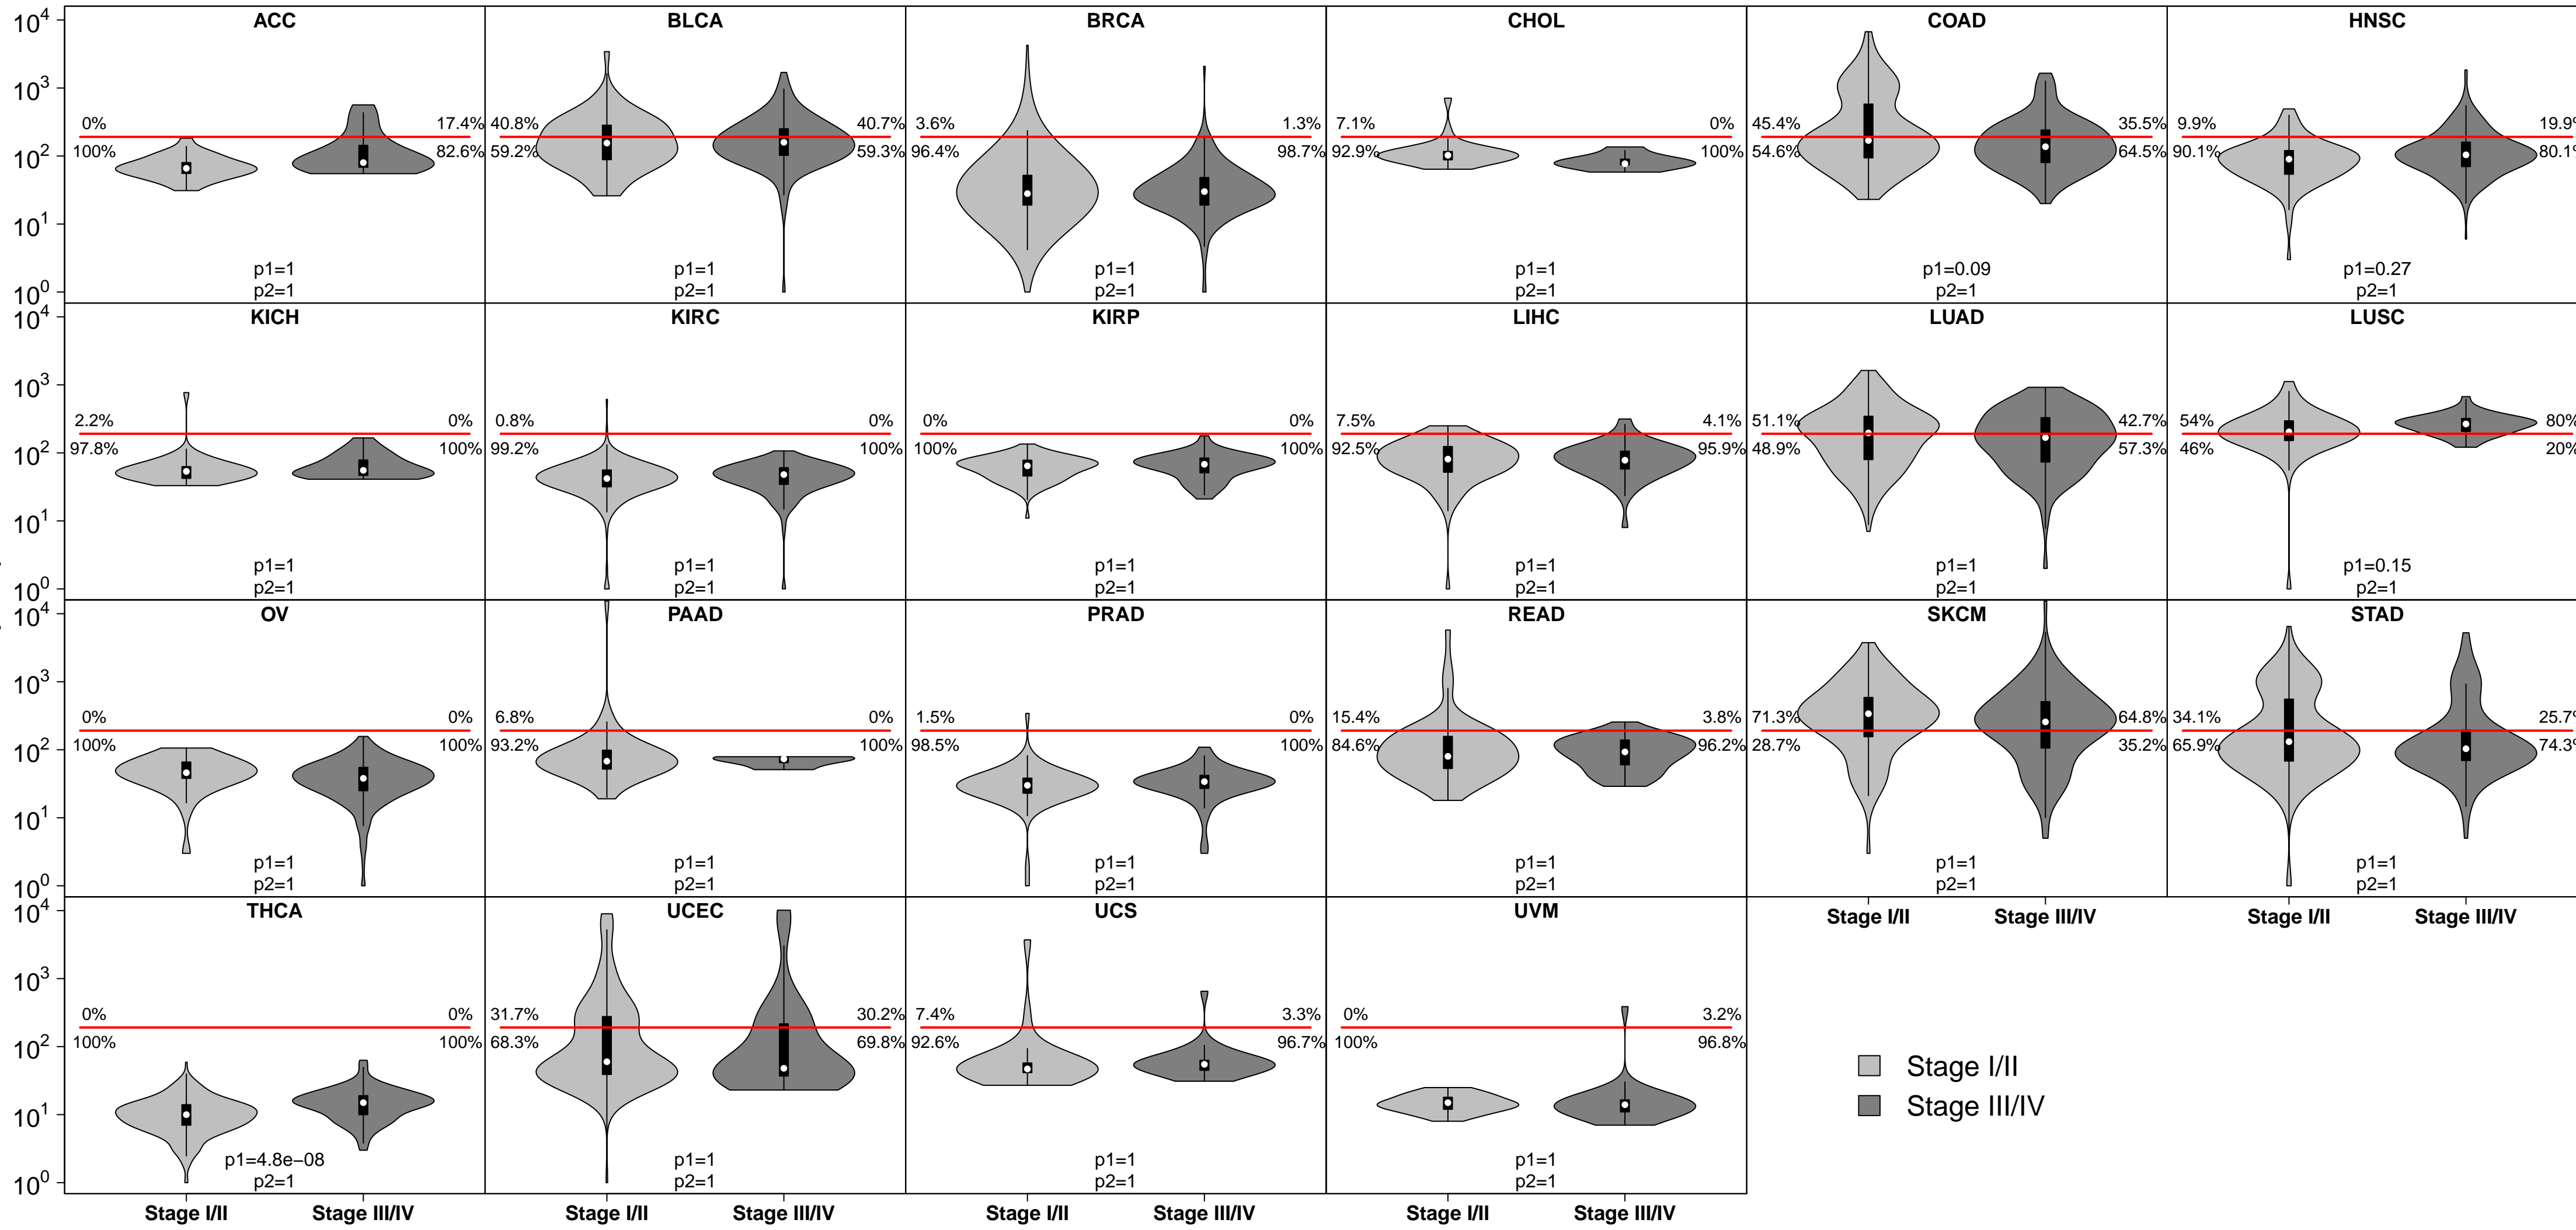

Stage I/II  
Stage III/IV

Supplement: NIHMS791660-supplement-4.pdf [file NIHMS791660-supplement-4.pdf]
